# Supplementary material for: Occurrence of Chlamydiaceae and Chlamydia felis pmp9 Typing in Conjunctival and Rectal Samples of Swiss Stray and Pet Cats
Source: MDPI journal article supplement (doi:10.3390/pathogens10080951), 2021-07-28
Supplement: s1 [file s1]

**Supplementary Table S1.** Individual and mean Ct ( $\mu$  Ct) values of sample duplicates obtained with flocked swabs (1) or cytology brushes (2) and differences of  $\mu$  Ct values within  $n = 35$  sample pairs ( $\Delta \mu$  Ct =  $\mu$  Ct<sub>2</sub> -  $\mu$  Ct<sub>1</sub>).

| Nr | Cat  | Flocked Swabs |                  |      |                       | Cytolog Brushes |                  |      |                       | $\Delta \mu$ Ct |
|----|------|---------------|------------------|------|-----------------------|-----------------|------------------|------|-----------------------|-----------------|
|    |      | Eye           | Ct of Duplicates |      | $\mu$ Ct <sub>1</sub> | Eye             | Ct of Duplicates |      | $\mu$ Ct <sub>2</sub> |                 |
| 1  | KE1  | Left          | 26.1             | 26.0 | 26.1                  | Right           | 27.1             | 27.3 | 27.2                  | 1.1             |
| 2  | KE2  | Left          | 23.9             | 24.0 | 24.0                  | Right           | 27.5             | 27.5 | 27.5                  | 3.5             |
| 3  | KN3  | Left          | 24.4             | 24.3 | 24.4                  | Right           | 27.4             | 27.5 | 27.5                  | 3.1             |
| 4  | KU1  | Left          | 23.8             | 23.9 | 23.9                  | Right           | 26.4             | 26.4 | 26.4                  | 2.5             |
| 5  | KU6  | Right         | 22.5             | 22.4 | 22.5                  | Left            | 24.8             | 24.8 | 24.8                  | 2.3             |
| 6  | KU7  | Left          | 27.7             | 27.7 | 27.7                  | Right           | 30.0             | 29.8 | 29.9                  | 2.2             |
| 7  | KZ2  | Left          | 25.2             | 25.1 | 25.2                  | Right           | 28.9             | 29.0 | 29.0                  | 3.8             |
| 8  | KZ8  | Right         | 22.3             | 22.2 | 22.3                  | Left            | 27.6             | 27.6 | 27.6                  | 5.3             |
| 9  | KZ9  | Right         | 24.0             | 23.8 | 23.9                  | Left            | 26.4             | 26.4 | 26.4                  | 2.5             |
| 10 | KZ10 | Left          | 23.9             | 23.9 | 23.9                  | Right           | 26.8             | 26.8 | 26.8                  | 2.9             |
| 11 | KZ13 | Right         | 23.5             | 23.4 | 23.5                  | Left            | 26.0             | 26.1 | 26.1                  | 2.6             |
| 12 | KZ15 | Right         | 22.3             | 22.4 | 22.4                  | Left            | 26.6             | 26.7 | 26.7                  | 4.3             |
| 13 | LD2  | Right         | 25.3             | 25.4 | 25.4                  | Left            | 28.6             | 28.6 | 28.6                  | 3.2             |
| 14 | LD3  | Left          | 23.9             | 23.9 | 23.9                  | Right           | 28.5             | 28.5 | 28.5                  | 4.6             |
| 15 | LE1  | Right         | 26.1             | 26.2 | 26.2                  | Left            | 27.8             | 27.8 | 27.8                  | 1.6             |
| 16 | LE2  | Left          | 26.6             | 26.6 | 26.6                  | Right           | 30.1             | 30.1 | 30.1                  | 3.5             |
| 17 | LJ1  | Left          | 29.2             | 29.1 | 29.2                  | Right           | 29.4             | 29.4 | 29.4                  | 0.2             |
| 18 | LK1  | Right         | 25.2             | 25.1 | 25.2                  | Left            | 26.6             | 26.5 | 26.6                  | 1.4             |
| 19 | LK2  | Left          | 25.1             | 25.1 | 25.1                  | Right           | 30.1             | 30.0 | 30.1                  | 5.0             |
| 20 | LK3  | Right         | 26.3             | 26.3 | 26.3                  | Left            | 28.4             | 28.6 | 28.5                  | 2.2             |
| 21 | LK5  | Left          | 26.1             | 26.1 | 26.1                  | Right           | 28.3             | 28.3 | 28.3                  | 2.2             |
| 22 | LK6  | Right         | 25.0             | 24.9 | 25.0                  | Left            | 26.4             | 26.4 | 26.4                  | 1.4             |
| 23 | LO2  | Right         | 25.2             | 25.2 | 25.2                  | Left            | 27.6             | 27.7 | 27.7                  | 2.5             |
| 24 | LP1  | Left          | 27.6             | 27.5 | 27.6                  | Right           | 29.8             | 30.0 | 29.9                  | 2.3             |
| 25 | MC1  | Left          | 27.1             | 27.0 | 27.1                  | Right           | 29.1             | 29.1 | 29.1                  | 2.0             |
| 26 | MD1  | Right         | 28.2             | 28.0 | 28.1                  | Left            | 26.4             | 26.4 | 26.4                  | -1.7            |
| 27 | ME3  | Left          | 23.4             | 23.5 | 23.5                  | Right           | 28.5             | 28.7 | 28.6                  | 5.1             |
| 28 | ME4  | Right         | 23.9             | 23.9 | 23.9                  | Left            | 25.5             | 25.6 | 25.6                  | 1.7             |
| 29 | MJ1  | Right         | 25.9             | 25.9 | 25.9                  | Left            | 24.9             | 24.9 | 24.9                  | -1.0            |
| 30 | MJ2  | Right         | 26.9             | 26.9 | 26.9                  | Left            | 27.7             | 27.7 | 27.7                  | 0.8             |
| 31 | MJ4  | Left          | 24.4             | 24.5 | 24.5                  | Right           | 27.8             | 27.8 | 27.8                  | 3.3             |
| 32 | ML4  | Left          | 25.7             | 25.8 | 25.8                  | Right           | 32.3             | 31.8 | 32.1                  | 6.3             |
| 33 | ML7  | Left          | 27.0             | 26.9 | 27.0                  | Right           | 30.1             | 30.2 | 30.2                  | 3.2             |
| 34 | ML8  | Left          | 25.9             | 26.0 | 26.0                  | Right           | 28.8             | 28.9 | 28.9                  | 2.9             |
| 35 | ML10 | Right         | 28.4             | 28.4 | 28.4                  | Left            | 27.3             | 27.3 | 27.3                  | -1.1            |

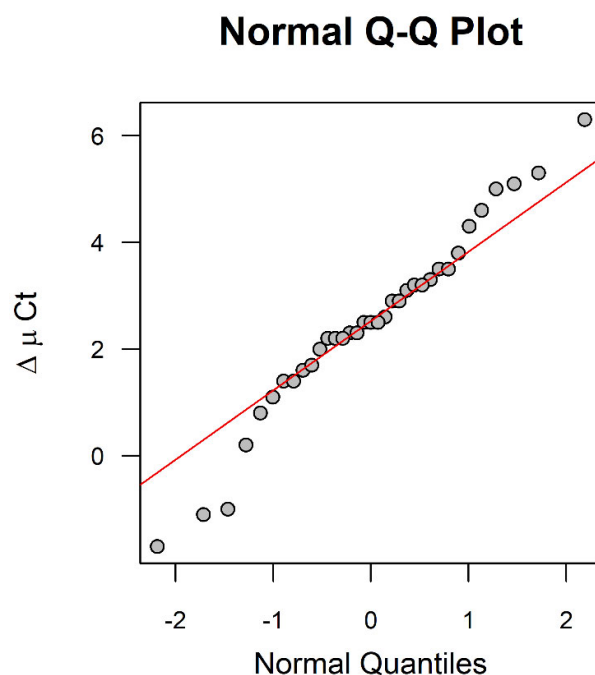

**Supplementary Figure S2.** Normal Q-Q plot of differences in mean Ct values between flocked swabs and cytology brushes: Differences in mean Ct values between  $n = 35$  sample pairs ( $\Delta \mu Ct$ ) obtained with flocked swabs (1) and cytology brushes (2) appear to follow a normal distribution. Normal Q-Q plot with  $\Delta \mu Ct = \mu Ct_2 - \mu Ct_1$  plotted against normal quantiles.

**Supplementary Table S3.** Results of statistical analysis performed in this study.

| Method                                                 | Statistical Test                | Output                                   | Interpretation                         |
|--------------------------------------------------------|---------------------------------|------------------------------------------|----------------------------------------|
| Feline albumin qPCR                                    | Shapiro-Wilk normality test     | $p\text{-value} = 0.446$                 | Not significant<br>Normal distribution |
| Feline albumin qPCR                                    | Paired t-test<br>(two-sided)    | $p\text{-value} = 8.768 \times 10^{-10}$ | Significant                            |
| Feline albumin qPCR                                    | Paired t-test power calculation | power = 0.9999995                        | Sufficient sample size                 |
| 23S qPCR (comparing symptomatic and asymptomatic cats) | Pearson's Chi-squared test      | $p\text{-value} = 8.953 \times 10^{-14}$ | Significant                            |
| 23S qPCR (comparing total stray and pet cats)          | Pearson's Chi-squared test      | $p\text{-value} = 0.155$                 | Not significant                        |
| 23S qPCR (comparing symptomatic stray and pet cats)    | Pearson's Chi-squared test      | $p\text{-value} = 4.956 \times 10^{-8}$  | Significant                            |
| 23S qPCR (comparing sampling sites)                    | Pearson's Chi-squared test      | $p\text{-value} = 1.805 \times 10^{-8}$  | Significant                            |

**Supplementary Table S4.** Positive samples, sampling site, mean Ct values ( $\mu$  Ct Values) of sample duplicates obtained from the 23S rRNA qPCR, calculated chlamydial genome copy numbers per  $\mu$ l of sample DNA and per swab as well as chlamydial DNA content per swab in ng.

| Sample  | Sampling Site | <i>Chlamydia</i> Species | $\mu$ Ct Values | Copies / $\mu$ l DNA | Copies / Swab | DNA / Swab [ng] |
|---------|---------------|--------------------------|-----------------|----------------------|---------------|-----------------|
| A6E.1e  | Eye           | <i>C. felis</i>          | 25.0            | 20,300.00            | 1,020,000     | 1.114           |
| A6E.2e  | Eye           | <i>C. felis</i>          | 24.0            | 36,600.00            | 1,830,000     | 2.006           |
| A7E.1e  | Eye           | <i>C. felis</i>          | 36.1            | 2.36                 | 1180          | 0.001           |
| AO47.2e | Eye           | <i>C. felis</i>          | 35.9            | 9.43                 | 471           | 0.001           |
| BC2.1e  | Eye           | <i>C. felis</i>          | 35.1            | 16.20                | 812           | 0.001           |
| BC2.2e  | Eye           | <i>C. felis</i>          | 34.9            | 24.50                | 1220          | 0.001           |
| BF1.1e  | Eye           | <i>C. felis</i>          | 31.5            | 821.00               | 41,000        | 0.045           |
| BF1.2e  | Eye           | <i>C. felis</i>          | 36.1            | 9.56                 | 478           | 0.001           |
| BT2e    | Eye           | <i>C. felis</i>          | 34.4            | 33.40                | 1670          | 0.002           |
| BX2.1e  | Eye           | <i>C. felis</i>          | 37.2            | 5.04                 | 252           | 0.000           |
| BX2.2e  | Eye           | <i>C. felis</i>          | 32.9            | 98.30                | 4910          | 0.005           |
| BY1.2e  | Eye           | <i>C. felis</i>          | 33.9            | 47.90                | 2400          | 0.003           |
| BY2.1e  | Eye           | <i>C. felis</i>          | 31.3            | 884.00               | 44,200        | 0.048           |
| BY2r    | Rectum        | <i>C. felis</i>          | 33.0            | 327.00               | 16,400        | 0.018           |
| CS2.1e  | Eye           | <i>C. felis</i>          | 26.0            | 7740.00              | 387,000       | 0.424           |
| CS2.2e  | Eye           | <i>C. felis</i>          | 32.0            | 125.00               | 6270          | 0.007           |
| CS4     | Unknown       | <i>C. felis</i>          | 29.8            | 1,030.00             | 51,700        | 0.057           |
| CS5.1e  | Eye           | <i>C. felis</i>          | 33.7            | 90.20                | 4510          | 0.005           |
| CS5r    | Rectum        | <i>Chlamydiaceae</i>     | 36.5            | 7.58                 | 379           | 0.000           |
| CS6     | Unknown       |                          | 31.4            | 384.00               | 19,200        | 0.021           |
| CS8.1e  | Eye           | <i>C. felis</i>          | 33.2            | 121.00               | 6040          | 0.007           |
| CS8.2e  | Eye           | <i>C. felis</i>          | 29.8            | 1030.00              | 51,300        | 0.056           |
| DD2.2e  | Eye           | <i>C. abortus</i>        | 36.5            | 9.31                 | 465           | 0.001           |
| ED7.1e  | Eye           | <i>C. felis</i>          | 37.9            | 5.50                 | 275           | 0.000           |
| ED7.2e  | Eye           | <i>C. felis</i>          | 36.4            | 14.20                | 711           | 0.001           |
| ED8.1e  | Eye           | <i>C. felis</i>          | 32.0            | 227.00               | 11,300        | 0.012           |
| ED8.2e  | Eye           | <i>C. felis</i>          | 32.8            | 141.00               | 7060          | 0.008           |
| EI1.1e  | Eye           | <i>C. felis</i>          | 28.5            | 1670.00              | 83,700        | 0.092           |
| EI1.2e  | Eye           | <i>C. felis</i>          | 29.8            | 688.00               | 34,400        | 0.038           |
| EI2e    | Eye           | <i>C. felis</i>          | 30.8            | 352.00               | 17,600        | 0.019           |
| EI3.1e  | Eye           | <i>C. felis</i>          | 27.9            | 2520.00              | 126,000       | 0.138           |
| EI3.2e  | Eye           | <i>C. felis</i>          | 26.0            | 9020.00              | 451,000       | 0.494           |
| EI3r    | Rectum        | <i>C. felis</i>          | 28.4            | 1780.00              | 89,200        | 0.098           |
| EI4.1e  | Eye           | <i>C. felis</i>          | 25.2            | 16,000.00            | 800,000       | 0.876           |
| EI4.2e  | Eye           | <i>C. felis</i>          | 22.3            | 112,000.00           | 5,580,000     | 6.114           |
| EI4r    | Rectum        | <i>C. felis</i>          | 32.8            | 86.10                | 4,310         | 0.005           |
| EK1.1e  | Eye           | <i>C. felis</i>          | 34.2            | 33.90                | 1,700         | 0.002           |
| EK1.2e  | Eye           | <i>C. felis</i>          | 30.5            | 792.00               | 39,600        | 0.043           |
| EM01e   | Eye           | <i>C. felis</i>          | 28.8            | 2100.00              | 105,000       | 0.115           |
| EM03.2e | Eye           | <i>C. felis</i>          | 25.7            | 12,200.00            | 608,000       | 0.667           |
| EM04e   | Eye           | <i>C. felis</i>          | 28.6            | 2390.00              | 120,000       | 0.131           |
| EM12.1e | Eye           | <i>C. felis</i>          | 31.2            | 532.00               | 26,600        | 0.029           |
| EM12.2e | Eye           | <i>C. felis</i>          | 34.0            | 106.00               | 5290          | 0.006           |
| EM13.2e | Eye           | <i>C. felis</i>          | 27.2            | 5140.00              | 257,000       | 0.282           |
| ES2.2e  | Eye           | <i>C. felis</i>          | 31.8            | 204.00               | 10,200        | 0.011           |
| F09r    | Rectum        | <i>C. felis</i>          | 29.5            | 591.00               | 29,500        | 0.032           |
| F13.1e  | Eye           | <i>C. felis</i>          | 31.4            | 125.00               | 6270          | 0.007           |

|         |        |                      |      |           |           |       |
|---------|--------|----------------------|------|-----------|-----------|-------|
| F13.2e  | Eye    | <i>C. felis</i>      | 30.5 | 231.00    | 11,500    | 0.013 |
| F18.1e  | Eye    | <i>C. felis</i>      | 29.9 | 290.00    | 14,500    | 0.016 |
| F18.2e  | Eye    | <i>C. felis</i>      | 33.3 | 26.90     | 1340      | 0.001 |
| F28.1e  | Eye    | <i>C. felis</i>      | 32.0 | 77.00     | 3850      | 0.004 |
| F28.2e  | Eye    | <i>C. felis</i>      | 33.8 | 22.20     | 1110      | 0.001 |
| F33.1e  | Eye    | <i>C. felis</i>      | 29.8 | 158.00    | 7920      | 0.009 |
| F33.2e  | Eye    | <i>C. felis</i>      | 30.4 | 104.00    | 5210      | 0.006 |
| F33r    | Rectum | <i>C. felis</i>      | 23.6 | 12,700.00 | 636,000   | 0.697 |
| F34.1e  | Eye    | <i>C. felis</i>      | 29.4 | 225.00    | 11,300    | 0.012 |
| F36.1e  | Eye    | <i>C. felis</i>      | 25.1 | 11,000.00 | 548,000   | 0.601 |
| F36.2e  | Eye    | <i>C. felis</i>      | 21.8 | 97,600.00 | 4,880,000 | 5.347 |
| F36r    | Rectum | <i>C. felis</i>      | 25.3 | 10,300.00 | 517,000   | 0.567 |
| F37.1e  | Eye    | <i>C. felis</i>      | 31.8 | 122.00    | 6080      | 0.007 |
| F37.2e  | Eye    | <i>C. felis</i>      | 32.1 | 99.90     | 5000      | 0.005 |
| F52.2e  | Eye    | <i>C. felis</i>      | 31.2 | 90.90     | 4550      | 0.005 |
| F52r    | Rectum | <i>Chlamydiaceae</i> | 33.2 | 22.50     | 1120      | 0.001 |
| F53.2e  | Eye    | <i>C. felis</i>      | 37.7 | 0.93      | 46        | 0.000 |
| KZ06r   | Rectum | <i>C. felis</i>      | 26.6 | 3880.00   | 194,000   | 0.213 |
| KZ16.1e | Eye    | <i>C. felis</i>      | 29.9 | 537.00    | 26,900    | 0.029 |
| LD1.2e  | Eye    | <i>C. abortus</i>    | 38.1 | 0.69      | 34        | 0.000 |
| LD4.1e  | Eye    | <i>C. abortus</i>    | 36.4 | 1.50      | 75        | 0.000 |
| LG1.1e  | Eye    | <i>C. felis</i>      | 31.7 | 62.40     | 3120      | 0.003 |
| LG1.2e  | Eye    | <i>C. felis</i>      | 31.1 | 99.50     | 4970      | 0.005 |
| LG1r    | Rectum | <i>C. felis</i>      | 37.0 | 1.46      | 73        | 0.000 |
| LG3e    | Eye    | <i>C. felis</i>      | 29.9 | 230.00    | 11,500    | 0.013 |
| LG5.1e  | Eye    | <i>C. felis</i>      | 34.3 | 10.30     | 517       | 0.001 |
| LG5.2e  | Eye    | <i>C. felis</i>      | 37.6 | 1.00      | 50        | 0.000 |
| LG6e    | Eye    | <i>C. felis</i>      | 28.4 | 602.00    | 30,100    | 0.033 |
| LQ1.1e  | Eye    | <i>C. felis</i>      | 32.0 | 39.60     | 1980      | 0.002 |
| LQ1.2e  | Eye    | <i>C. felis</i>      | 31.4 | 56.60     | 2830      | 0.003 |
| LQ2.2e  | Eye    | <i>C. felis</i>      | 33.3 | 22.80     | 1,140     | 0.001 |
| LQ4.1e  | Eye    | <i>C. felis</i>      | 26.1 | 3430.00   | 171,000   | 0.188 |
| LQ4.2e  | Eye    | <i>C. felis</i>      | 25.6 | 4970.00   | 248,000   | 0.272 |
| LQ4r    | Rectum | <i>Chlamydiaceae</i> | 36.3 | 1.88      | 94        | 0.000 |
| LQ5e    | Eye    | <i>C. felis</i>      | 31.6 | 75.90     | 3790      | 0.004 |
| LQ6.1e  | Eye    | <i>C. felis</i>      | 31.7 | 73.50     | 3680      | 0.004 |
| LQ6.2e  | Eye    | <i>C. felis</i>      | 29.9 | 248.00    | 12,400    | 0.014 |
| LR1.2e  | Eye    | <i>C. felis</i>      | 29.6 | 304.00    | 15,200    | 0.017 |
| LR2.1e  | Eye    | <i>C. felis</i>      | 27.6 | 1260.00   | 62,800    | 0.069 |
| LR2.2e  | Eye    | <i>C. felis</i>      | 27.7 | 1170.00   | 58,700    | 0.064 |
| LR2r    | Rectum | <i>C. felis</i>      | 24.2 | 13,100.00 | 655,000   | 0.718 |
| LR3e    | Eye    | <i>C. felis</i>      | 28.3 | 754.00    | 37,700    | 0.041 |
| LR4.1e  | Eye    | <i>C. felis</i>      | 31.2 | 98.20     | 4910      | 0.005 |
| LR4.2e  | Eye    | <i>C. felis</i>      | 28.9 | 500.00    | 25,000    | 0.027 |
| LR4r    | Rectum | <i>Chlamydiaceae</i> | 31.4 | 87.90     | 4390      | 0.005 |
| MB9.1e  | Eye    | <i>C. felis</i>      | 29.8 | 204.00    | 10,200    | 0.011 |
| MB9.2e  | Eye    | <i>C. felis</i>      | 29.4 | 270.00    | 13,500    | 0.015 |
| MK2.1e  | Eye    | <i>C. felis</i>      | 35.0 | 4.75      | 237       | 0.000 |
| MK2.2e  | Eye    | <i>C. felis</i>      | 31.9 | 41.80     | 2090      | 0.002 |
| MK2r    | Rectum | <i>C. felis</i>      | 27.4 | 2460.00   | 123,000   | 0.135 |
| MK3e    | Eye    | <i>C. felis</i>      | 28.4 | 523.00    | 26,100    | 0.029 |

|        |        |                      |      |         |        |       |
|--------|--------|----------------------|------|---------|--------|-------|
| MK3r   | Rectum | <i>Chlamydiaceae</i> | 27.4 | 1120.00 | 55,900 | 0.060 |
| MM1.1e | Eye    | <i>C. felis</i>      | 35.7 | 3.50    | 175    | 0.000 |
| MM2.1e | Eye    | <i>C. felis</i>      | 34.8 | 6.87    | 344    | 0.000 |
| MM3.1e | Eye    | <i>C. felis</i>      | 33.8 | 14.20   | 708    | 0.001 |
| MM3.2e | Eye    | <i>C. felis</i>      | 31.5 | 73.00   | 3650   | 0.004 |
| MM4.1e | Eye    | <i>C. felis</i>      | 31.5 | 74.60   | 3730   | 0.004 |
| MM4.2e | Eye    | <i>C. felis</i>      | 30.1 | 218.00  | 10,900 | 0.012 |
| MM6e   | Eye    | <i>C. felis</i>      | 33.0 | 28.00   | 1400   | 0.002 |
| MM7.1e | Eye    | <i>C. felis</i>      | 31.1 | 104.00  | 5190   | 0.006 |
| MM7.2e | Eye    | <i>C. felis</i>      | 36.6 | 2.25    | 113    | 0.000 |
| MM7r   | Rectum | <i>Chlamydiaceae</i> | 36.2 | 3.06    | 153    | 0.000 |
| MN1.2e | Eye    | <i>C. felis</i>      | 32.0 | 57.80   | 2890   | 0.003 |
| MO1.1e | Eye    | <i>C. felis</i>      | 30.1 | 215.00  | 10,700 | 0.012 |
| MO1.2e | Eye    | <i>C. felis</i>      | 28.6 | 587.00  | 29,300 | 0.032 |
| MO3.1e | Eye    | <i>C. felis</i>      | 29.7 | 286.00  | 14,300 | 0.016 |
| MO3.2e | Eye    | <i>C. felis</i>      | 30.4 | 175.00  | 8770   | 0.010 |
| MP1e   | Eye    | <i>C. felis</i>      | 34.8 | 8.02    | 401    | 0.000 |
| MP2.2e | Eye    | <i>C. felis</i>      | 28.9 | 516.00  | 25,800 | 0.028 |

**Supplementary Table S5.** Number of stray and pet cats and number of samples from different sampling sites (conjunctival, rectal, unknown sampling site and total swabs) per year and canton.

| Population | Year     | Canton | Cats | Conjunctival Swabs | Rectal Swabs | Unknown Swabs | Total Swabs |
|------------|----------|--------|------|--------------------|--------------|---------------|-------------|
| Stray cats |          |        | 309  | 413                | 301          | 2             | 716         |
|            | 2017     | FR     | 28   | 30                 | 28           | 0             | 58          |
|            |          | NW     | 35   | 50                 | 33           | 2             | 85          |
|            | 2018     | FR     | 29   | 31                 | 28           | 0             | 59          |
|            |          | NW     | 62   | 77                 | 61           | 0             | 138         |
|            | 2020     | BE     | 34   | 50                 | 32           | 0             | 82          |
|            |          | NW     | 57   | 82                 | 55           | 0             | 137         |
|            |          | OW     | 64   | 93                 | 64           | 0             | 157         |
|            | Pet cats |        |      | 86                 | 152          | 86            | 0           |
| 2020       | ZH       | 77     | 135  | 77                 | 0            | 212           |             |
| 2021       | ZH       | 9      | 17   | 9                  | 0            | 26            |             |
| Total cats |          |        | 395  | 565                | 387          | 2             | 954         |
